# Supplementary material for: Surface confined pseudorotaxanes with electrochemically controllable complexation propertiesElectronic supplementary information (ESI) available: further experimental and theoretical data. See http://www.rsc.org/suppdata/jm/b3/b306274k/
Source: Royal Society of Chemistry journal article supplement (doi:10.1039/b306274k), 2003-01-01
Supplement: b306274k.doc [file b306274k.doc]

Surface confined pseudorotaxanes with electrochemically controllable complexation properties

**Martin R. Bryce, Graeme Cooke, Florence M. A. Duclairoir, Phillip John, Dmitrii F. Perepichka, Neil Polwart, Vincent M. Rotello, J. Fraser Stoddart and Hsian-Rong Tseng**


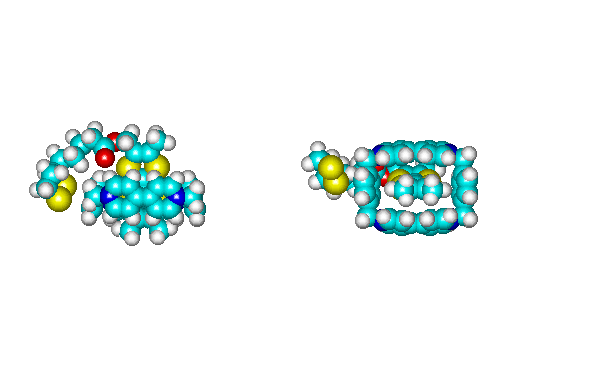


Energy minimised structure of 1•3 from the two different perspectives.


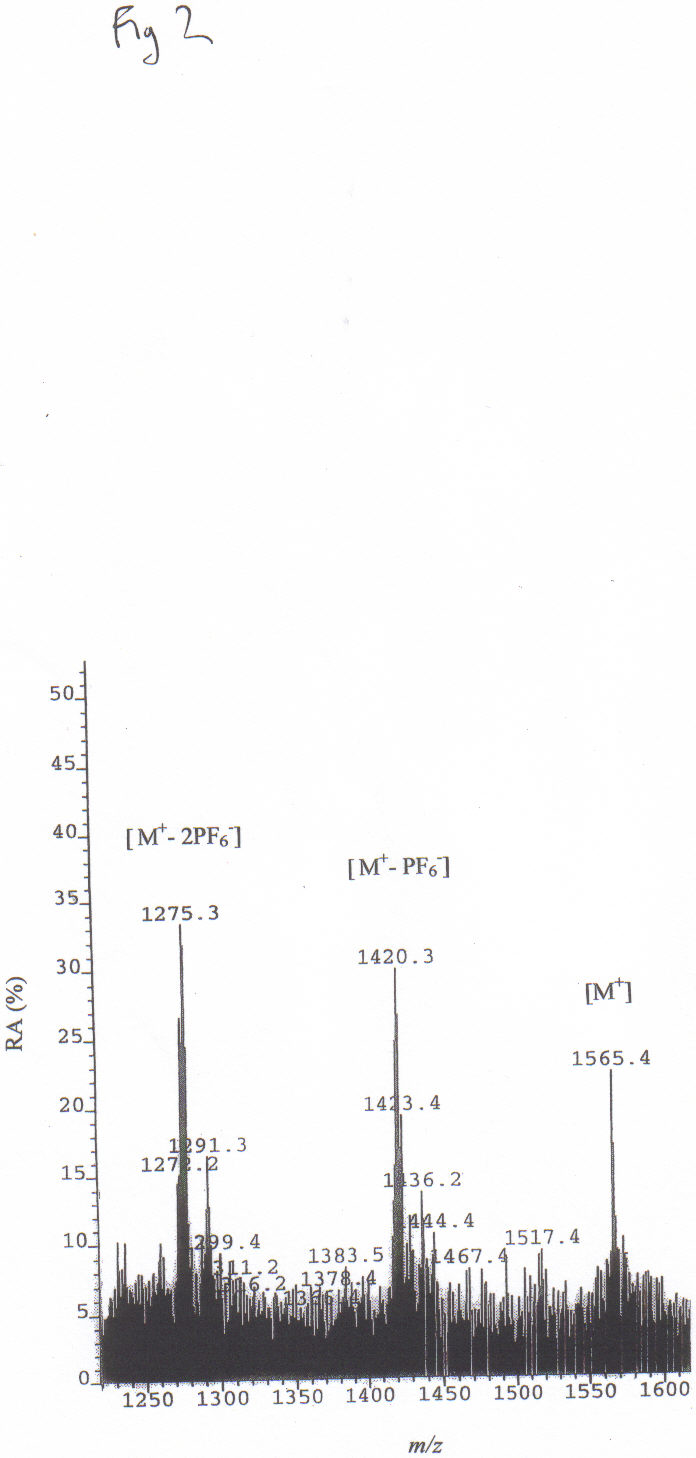


FAB-MS of 1•3
